# Supplementary material for: Health‐related quality of life and its predictors among the type 2 diabetes population of Bangladesh: A nation‐wide cross‐sectional study
Source: PubMed Central journal article supplement — J Diabetes Investig. 2020 Aug 3;12(2):277–85. doi: 10.1111/jdi.13331 (PMC7858106; doi:10.1111/jdi.13331), 2020-08-03
Supplement: JDI-12-277-s001.pdf [file JDI-12-277-s001.pdf]

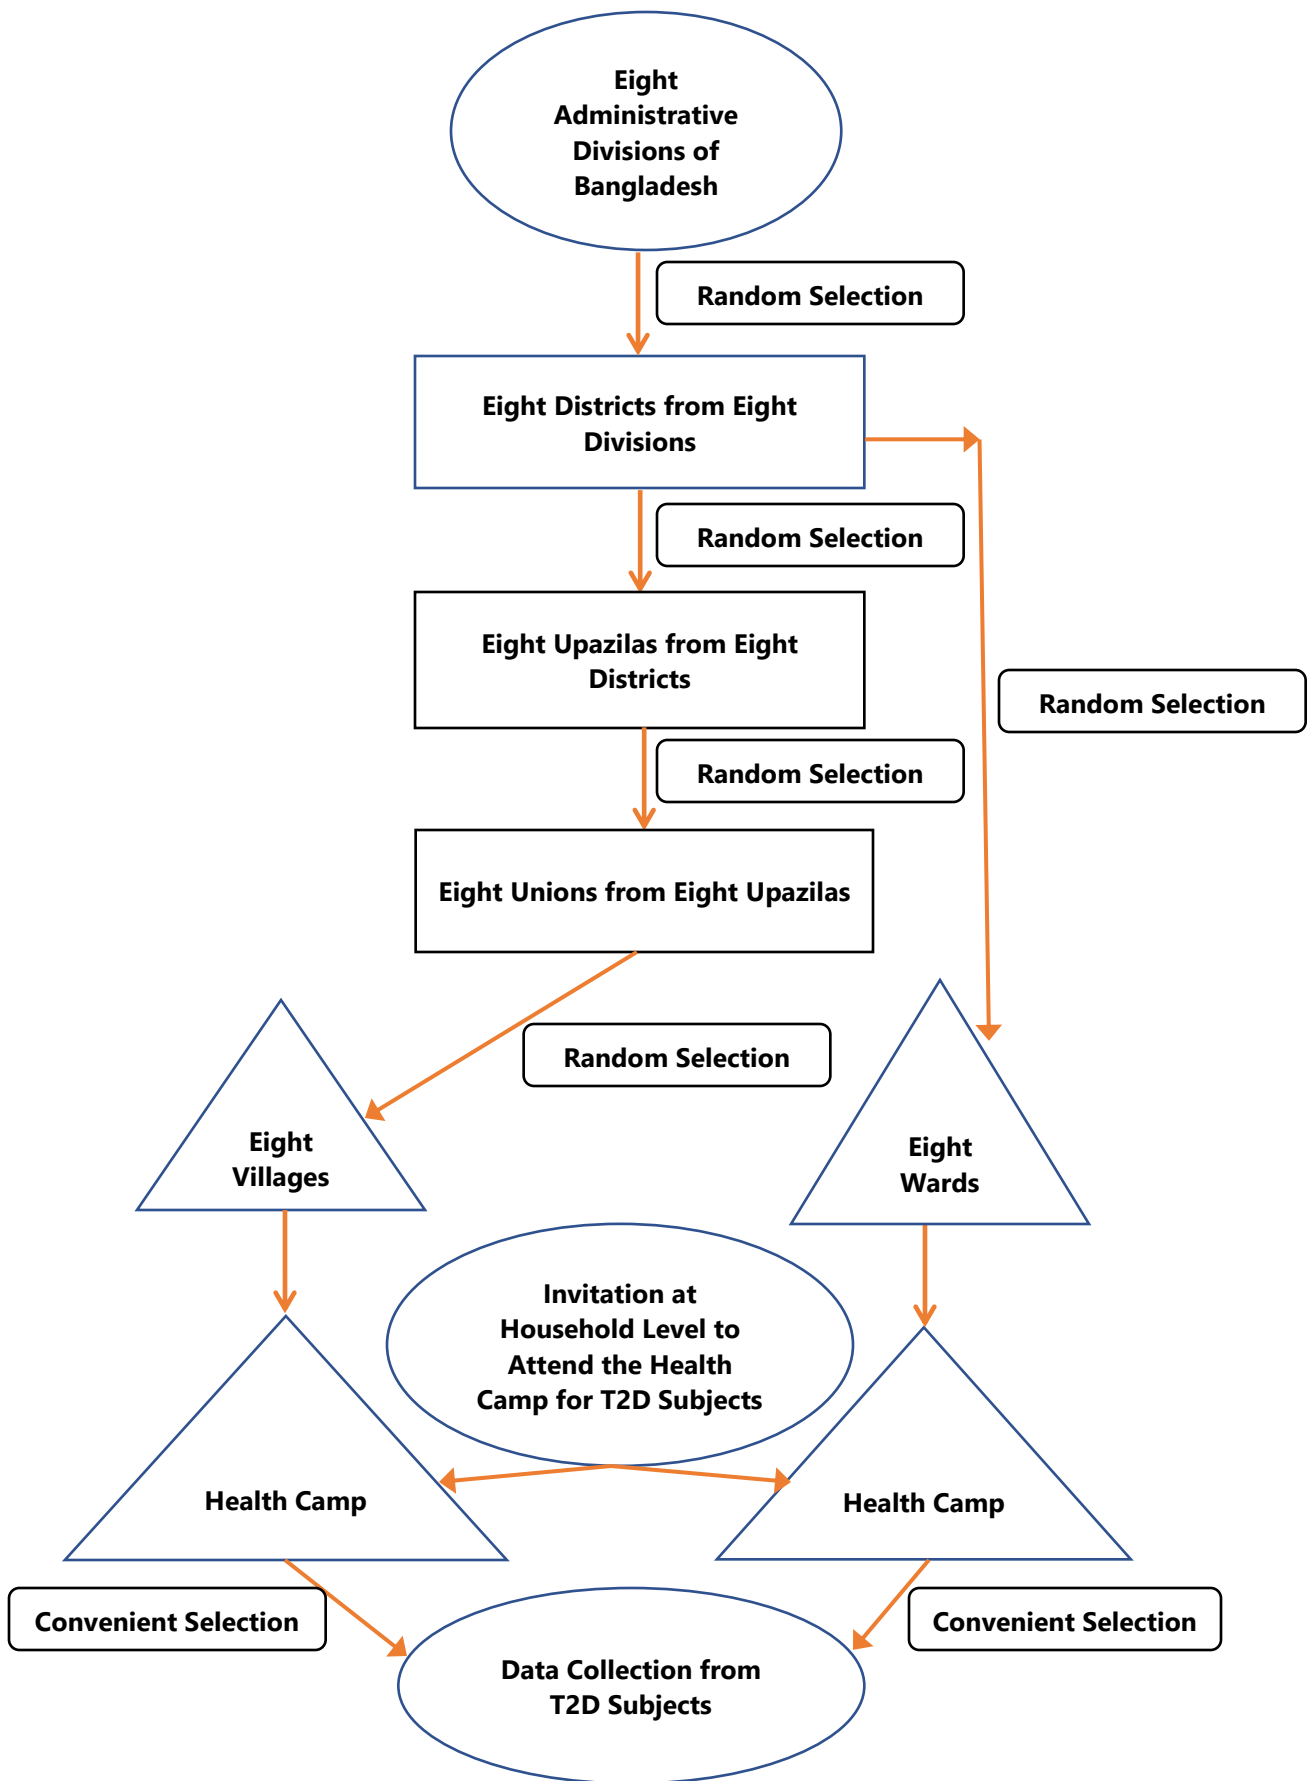

Supporting figure 1. Sampling method applied to collect data from type 2 Diabetic subjects of Bangladesh
