# Supplementary material for: Health‐related quality of life and its predictors among the type 2 diabetes population of Bangladesh: A nation‐wide cross‐sectional study
Source: PubMed Central journal article supplement — J Diabetes Investig. 2020 Aug 3;12(2):277–85. doi: 10.1111/jdi.13331 (PMC7858106; doi:10.1111/jdi.13331), 2020-08-03
Supplement: JDI-12-277-s002.pdf [file JDI-12-277-s002.pdf]

**Table S1: Levels/ranks of health-related quality of life using EQ-5D-5L cross-walk index score among type-2 diabetic subjects of Bangladesh, n=1806**

| <b>Levels/ranks</b> | <b>Calculation</b>                                                 | <b>Percentiles</b>                               | <b>Cut-off Value</b> | <b>Percentage (%)</b> |
|---------------------|--------------------------------------------------------------------|--------------------------------------------------|----------------------|-----------------------|
| <b>Poor</b>         | $\leq 25^{\text{th}}$ percentile                                   |                                                  | $\leq 0.531$         | 25.0                  |
| <b>Average</b>      | $> 25^{\text{th}}$ percentile and $\leq 75^{\text{th}}$ percentile | $25^{\text{th}}-0.531$<br>$75^{\text{th}}-0.768$ | 0.532 – 0.768        | 53.4                  |
| <b>Good</b>         | $> 75^{\text{th}}$ percentile                                      |                                                  | $> 0.768$            | 21.6                  |
