# Supplementary material for: Health‐related quality of life and its predictors among the type 2 diabetes population of Bangladesh: A nation‐wide cross‐sectional study
Source: PubMed Central journal article supplement — J Diabetes Investig. 2020 Aug 3;12(2):277–85. doi: 10.1111/jdi.13331 (PMC7858106; doi:10.1111/jdi.13331), 2020-08-03
Supplement: JDI-12-277-s003.pdf [file JDI-12-277-s003.pdf]

**Table S<sub>2</sub>: EQ-5D-5L index score according to sex and area of residence, n = 1806**

| <b>Variables</b> | <b>Mean</b> | <b>SD</b> | <b>Median</b> | <b>IQR</b>  |
|------------------|-------------|-----------|---------------|-------------|
| Men              | 0.68        | 0.23      | 0.71          | 0.58 – 0.84 |
| Women            | 0.58        | 0.25      | 0.60          | 0.51 – 0.75 |
| Urban            | 0.60        | 0.27      | 0.64          | 0.52 – 0.77 |
| Rural            | 0.65        | 0.20      | 0.67          | 0.56 – 0.77 |
| Total            | 0.62        | 0.25      | 0.65          | 0.53 – 0.77 |

SD, standard deviation; IQR, interquartile range
