# Supplementary material for: Health‐related quality of life and its predictors among the type 2 diabetes population of Bangladesh: A nation‐wide cross‐sectional study
Source: PubMed Central journal article supplement — J Diabetes Investig. 2020 Aug 3;12(2):277–85. doi: 10.1111/jdi.13331 (PMC7858106; doi:10.1111/jdi.13331), 2020-08-03
Supplement: JDI-12-277-s004.pdf [file JDI-12-277-s004.pdf]

**Table S3: Area based distribution of reported problems using five dimensions of EQ-5D-5L, n=1806**

| <b>Dimensions</b>         | <b>Urban</b> | <b>Rural</b> |
|---------------------------|--------------|--------------|
| <b>Mobility</b>           | 707 (63.5)   | 393 (56.8)   |
| <b>Self-care</b>          | 560 (50.3)   | 305 (44.1)   |
| <b>Usual activities</b>   | 591 (53.1)   | 374 (54)     |
| <b>Pain/discomfort</b>    | 870 (78.1)   | 533 (77)     |
| <b>Anxiety/depression</b> | 897 (80.5)   | 545 (78.8)   |
