# Supplementary material for: Health‐related quality of life and its predictors among the type 2 diabetes population of Bangladesh: A nation‐wide cross‐sectional study
Source: PubMed Central journal article supplement — J Diabetes Investig. 2020 Aug 3;12(2):277–85. doi: 10.1111/jdi.13331 (PMC7858106; doi:10.1111/jdi.13331), 2020-08-03
Supplement: JDI-12-277-s005.pdf [file JDI-12-277-s005.pdf]

**Table S4: Proportion of diabetic population reported five levels of health status according to dimensions of EQ-5D-5L and age groups, n=1806**

| Dimensions              | Levels*  | Age groups (years), n (%) |            |            |            |            | Overall n (%) |
|-------------------------|----------|---------------------------|------------|------------|------------|------------|---------------|
|                         |          | < 30                      | 30 – 39    | 40 - 49    | 50 - 59    | ≥ 60       |               |
| <b>Mobility</b>         | <b>1</b> | 13 (54.2)                 | 146 (54.5) | 213 (45.5) | 205 (36.2) | 129 (26.9) | 706 (39.1)    |
|                         | <b>2</b> | 7 (29.2)                  | 84 (31.3)  | 156 (33.3) | 196 (34.6) | 198 (41.3) | 641 (35.5)    |
|                         | <b>3</b> | 3 (12.5)                  | 25 (9.3)   | 73 (15.6)  | 116 (20.5) | 96 (20)    | 313 (17.3)    |
|                         | <b>4</b> | 1 (4.2)                   | 13 (4.9)   | 24 (5.1)   | 45 (7.9)   | 48 (10)    | 131 (7.3)     |
|                         | <b>5</b> | 0                         | 0          | 2 (0.4)    | 5 (0.9)    | 8 (1.7)    | 15 (0.8)      |
| <b>Self-care</b>        | <b>1</b> | 14 (58.3)                 | 167 (62.3) | 259 (55.3) | 290 (51.1) | 211 (44.1) | 941 (52.1)    |
|                         | <b>2</b> | 8 (33.3)                  | 73 (27.2)  | 136 (29.1) | 175 (30.9) | 137 (28.6) | 529 (29.3)    |
|                         | <b>3</b> | 2 (8.3)                   | 22 (8.2)   | 58 (12.4)  | 68 (12)    | 88 (18.4)  | 238 (13.2)    |
|                         | <b>4</b> | 0                         | 6 (2.2)    | 11 (2.4)   | 23 (4.1)   | 29 (6.1)   | 69 (3.8)      |
|                         | <b>5</b> | 0                         | 0          | 4 (0.9)    | 11 (1.9)   | 14 (2.9)   | 29 (1.6)      |
| <b>Usual activities</b> | <b>1</b> | 14 (58.3)                 | 160 (59.7) | 238 (50.9) | 264 (46.6) | 165 (34.4) | 841 (46.6)    |
|                         | <b>2</b> | 5 (20.8)                  | 74 (27.6)  | 141 (30.1) | 187 (33)   | 152 (31.7) | 559 (31)      |
|                         | <b>3</b> | 4 (16.7)                  | 27 (10.1)  | 75 (16)    | 78 (13.8)  | 108 (22.5) | 292 (16.2)    |
|                         | <b>4</b> | 1 (4.2)                   | 7 (2.6)    | 12 (2.6)   | 29 (5.1)   | 37 (7.7)   | 86 (4.8)      |
|                         | <b>5</b> | 0                         | 0          | 2 (0.4)    | 9 (1.6)    | 17 (3.5)   | 28 (1.6)      |
| <b>Pain/discomfort</b>  | <b>1</b> | 7 (29.2)                  | 81 (30.2)  | 110 (23.5) | 120 (21.2) | 85 (17.7)  | 403 (22.3)    |
|                         | <b>2</b> | 7 (29.2)                  | 111 (41.4) | 200 (42.7) | 230 (40.6) | 173 (36.1) | 721 (39.9)    |

|                           |          |           |            |            |            |            |            |
|---------------------------|----------|-----------|------------|------------|------------|------------|------------|
|                           | <b>3</b> | 8 (33.3)  | 54 (20.1)  | 110 (23.5) | 141 (24.9) | 141 (29.4) | 454 (25.1) |
|                           | <b>4</b> | 2 (8.3)   | 21 (7.8)   | 43 (9.2)   | 67 (11.8)  | 69 (14.4)  | 202 (11.2) |
|                           | <b>5</b> | 0         | 1 (0.4)    | 5 (1.1)    | 9 (1.6)    | 11 (2.3)   | 26 (1.4)   |
|                           | <b>1</b> | 1 (4.2)   | 68 (25.4)  | 89 (19)    | 107 (18.9) | 99 (20.7)  | 364 (20.2) |
|                           | <b>2</b> | 8 (33.3)  | 119 (44.4) | 204 (43.6) | 227 (40)   | 181 (37.8) | 739 (40.9) |
| <b>Anxiety/depression</b> | <b>3</b> | 13 (54.2) | 54 (20.1)  | 125 (26.7) | 155 (27.3) | 121 (25.3) | 468 (25.9) |
|                           | <b>4</b> | 2 (8.3)   | 23 (8.6)   | 41 (8.8)   | 61 (10.8)  | 67 (14)    | 194 (10.7) |
|                           | <b>5</b> | 0         | 4 (1.5)    | 9 (1.9)    | 17 (3)     | 11 (2.3)   | 41 (2.3)   |

\*1=no problems, 2=slight problems, 3=moderate problems, 4=severe problems, 5=extreme problems
