# Supplementary material for: Health‐related quality of life and its predictors among the type 2 diabetes population of Bangladesh: A nation‐wide cross‐sectional study
Source: PubMed Central journal article supplement — J Diabetes Investig. 2020 Aug 3;12(2):277–85. doi: 10.1111/jdi.13331 (PMC7858106; doi:10.1111/jdi.13331), 2020-08-03
Supplement: JDI-12-277-s006.pdf [file JDI-12-277-s006.pdf]

### *Sample size estimation*

The following formula was used for calculating the adequate sample size in the study

$$n = \frac{Z^2 P(1 - P)}{d^2}$$

Here, n= sample size, z = normal standard variate, P= prevalence (obtained from a study conducted by the other researchers) and d = degree of precision (corresponding to effect size).

However, in the previous study prevalence of pain/discomfort among T2D population in Bangladesh was 58% [21]. We assume p= 0.58, q=1-p=0.42, Z = 1.96 (at 95% Confidence Interval), and d = 0.03 (at 3% standard error). Using the above mentioned information, the estimated sample size is 1039 ( $3.8416 \times 0.58 \times 0.42 / 0.0009 = 1039$ ). This basic sample size was adjusted for design effect of 1.5 and the required sample size was therefore  $n = 1039 \times 1.5 = 1558$ . However, assuming a non-response rate of 15%, the final sample size was  $1558 / 0.85 = \mathbf{1832}$ .
